# Supplementary material
Source: ML conference proceedings conference paper supplement (https://proceedings.neurips.cc/paper_files/paper/2022/hash/4e9d8aeeab6120c3c83ccf95d4c211d3-Abstract.html)
Supplement: Supplementary file 1 [file 4e9d8aeeab6120c3c83ccf95d4c211d3-Supplemental-Conference.zip]

Archive with 239 entries (216 files):
- DictTTS-Supplementary Material/
- DictTTS-Supplementary Material/appendix_dict-tts.pdf
- __MACOSX/DictTTS-Supplementary Material/._appendix_dict-tts.pdf
- DictTTS-Supplementary Material/.DS_Store
- __MACOSX/DictTTS-Supplementary Material/._.DS_Store
- DictTTS-Supplementary Material/audio_sample/
- DictTTS-Supplementary Material/audio_sample/Commonvoice(HK)/
- DictTTS-Supplementary Material/audio_sample/.DS_Store
- DictTTS-Supplementary Material/audio_sample/jsut/
- DictTTS-Supplementary Material/audio_sample/biaobei/
- DictTTS-Supplementary Material/audio_sample/Commonvoice(HK)/dicttts/
- DictTTS-Supplementary Material/audio_sample/Commonvoice(HK)/.DS_Store
- __MACOSX/DictTTS-Supplementary Material/audio_sample/Commonvoice(HK)/._.DS_Store
- DictTTS-Supplementary Material/audio_sample/Commonvoice(HK)/gt/
- DictTTS-Supplementary Material/audio_sample/Commonvoice(HK)/character/
- DictTTS-Supplementary Material/audio_sample/Commonvoice(HK)/gt_vocoder/
- DictTTS-Supplementary Material/audio_sample/Commonvoice(HK)/phoneme(pycantonese)/
- DictTTS-Supplementary Material/audio_sample/Commonvoice(HK)/transcripts.txt
- __MACOSX/DictTTS-Supplementary Material/audio_sample/Commonvoice(HK)/._transcripts.txt
- DictTTS-Supplementary Material/audio_sample/jsut/dicttts/
- DictTTS-Supplementary Material/audio_sample/jsut/.DS_Store
- __MACOSX/DictTTS-Supplementary Material/audio_sample/jsut/._.DS_Store
- DictTTS-Supplementary Material/audio_sample/jsut/gt/
- DictTTS-Supplementary Material/audio_sample/jsut/character/
- DictTTS-Supplementary Material/audio_sample/jsut/gt_vocoder/
- DictTTS-Supplementary Material/audio_sample/jsut/transcripts.txt
- __MACOSX/DictTTS-Supplementary Material/audio_sample/jsut/._transcripts.txt
- DictTTS-Supplementary Material/audio_sample/jsut/phoneme(pyopenjtalk)/
- DictTTS-Supplementary Material/audio_sample/biaobei/dicttts/
- DictTTS-Supplementary Material/audio_sample/biaobei/.DS_Store
- DictTTS-Supplementary Material/audio_sample/biaobei/gt/
- __MACOSX/DictTTS-Supplementary Material/audio_sample/biaobei/._gt
- DictTTS-Supplementary Material/audio_sample/biaobei/nlr/
- DictTTS-Supplementary Material/audio_sample/biaobei/character/
- DictTTS-Supplementary Material/audio_sample/biaobei/phoneme(pypinyin)/
- DictTTS-Supplementary Material/audio_sample/biaobei/gt_vocoder/
- DictTTS-Supplementary Material/audio_sample/biaobei/phoneme(g2pm)/
- DictTTS-Supplementary Material/audio_sample/biaobei/transcripts.txt
- __MACOSX/DictTTS-Supplementary Material/audio_sample/biaobei/._transcripts.txt
- DictTTS-Supplementary Material/audio_sample/biaobei/BERT_embedding/
- DictTTS-Supplementary Material/audio_sample/Commonvoice(HK)/dicttts/.DS_Store
- __MACOSX/DictTTS-Supplementary Material/audio_sample/Commonvoice(HK)/dicttts/._.DS_Store
- DictTTS-Supplementary Material/audio_sample/Commonvoice(HK)/dicttts/5.wav
- __MACOSX/DictTTS-Supplementary Material/audio_sample/Commonvoice(HK)/dicttts/._5.wav
- DictTTS-Supplementary Material/audio_sample/Commonvoice(HK)/dicttts/4.wav
- __MACOSX/DictTTS-Supplementary Material/audio_sample/Commonvoice(HK)/dicttts/._4.wav
- DictTTS-Supplementary Material/audio_sample/Commonvoice(HK)/dicttts/1.wav
- __MACOSX/DictTTS-Supplementary Material/audio_sample/Commonvoice(HK)/dicttts/._1.wav
- DictTTS-Supplementary Material/audio_sample/Commonvoice(HK)/dicttts/3.wav
- __MACOSX/DictTTS-Supplementary Material/audio_sample/Commonvoice(HK)/dicttts/._3.wav
- DictTTS-Supplementary Material/audio_sample/Commonvoice(HK)/dicttts/2.wav
- __MACOSX/DictTTS-Supplementary Material/audio_sample/Commonvoice(HK)/dicttts/._2.wav
- DictTTS-Supplementary Material/audio_sample/Commonvoice(HK)/gt/.DS_Store
- __MACOSX/DictTTS-Supplementary Material/audio_sample/Commonvoice(HK)/gt/._.DS_Store
- DictTTS-Supplementary Material/audio_sample/Commonvoice(HK)/gt/5.wav
- __MACOSX/DictTTS-Supplementary Material/audio_sample/Commonvoice(HK)/gt/._5.wav
- DictTTS-Supplementary Material/audio_sample/Commonvoice(HK)/gt/4.wav
- __MACOSX/DictTTS-Supplementary Material/audio_sample/Commonvoice(HK)/gt/._4.wav
- DictTTS-Supplementary Material/audio_sample/Commonvoice(HK)/gt/1.wav
- __MACOSX/DictTTS-Supplementary Material/audio_sample/Commonvoice(HK)/gt/._1.wav
- DictTTS-Supplementary Material/audio_sample/Commonvoice(HK)/gt/3.wav
- __MACOSX/DictTTS-Supplementary Material/audio_sample/Commonvoice(HK)/gt/._3.wav
- DictTTS-Supplementary Material/audio_sample/Commonvoice(HK)/gt/2.wav
- __MACOSX/DictTTS-Supplementary Material/audio_sample/Commonvoice(HK)/gt/._2.wav
- DictTTS-Supplementary Material/audio_sample/Commonvoice(HK)/character/.DS_Store
- __MACOSX/DictTTS-Supplementary Material/audio_sample/Commonvoice(HK)/character/._.DS_Store
- DictTTS-Supplementary Material/audio_sample/Commonvoice(HK)/character/5.wav
- __MACOSX/DictTTS-Supplementary Material/audio_sample/Commonvoice(HK)/character/._5.wav
- DictTTS-Supplementary Material/audio_sample/Commonvoice(HK)/character/4.wav
- __MACOSX/DictTTS-Supplementary Material/audio_sample/Commonvoice(HK)/character/._4.wav
- DictTTS-Supplementary Material/audio_sample/Commonvoice(HK)/character/1.wav
- __MACOSX/DictTTS-Supplementary Material/audio_sample/Commonvoice(HK)/character/._1.wav
- DictTTS-Supplementary Material/audio_sample/Commonvoice(HK)/character/3.wav
- __MACOSX/DictTTS-Supplementary Material/audio_sample/Commonvoice(HK)/character/._3.wav
- DictTTS-Supplementary Material/audio_sample/Commonvoice(HK)/character/2.wav
- __MACOSX/DictTTS-Supplementary Material/audio_sample/Commonvoice(HK)/character/._2.wav
- DictTTS-Supplementary Material/audio_sample/Commonvoice(HK)/gt_vocoder/.DS_Store
- __MACOSX/DictTTS-Supplementary Material/audio_sample/Commonvoice(HK)/gt_vocoder/._.DS_Store
- DictTTS-Supplementary Material/audio_sample/Commonvoice(HK)/gt_vocoder/5.wav
- __MACOSX/DictTTS-Supplementary Material/audio_sample/Commonvoice(HK)/gt_vocoder/._5.wav
- DictTTS-Supplementary Material/audio_sample/Commonvoice(HK)/gt_vocoder/4.wav
- __MACOSX/DictTTS-Supplementary Material/audio_sample/Commonvoice(HK)/gt_vocoder/._4.wav
- DictTTS-Supplementary Material/audio_sample/Commonvoice(HK)/gt_vocoder/1.wav
- __MACOSX/DictTTS-Supplementary Material/audio_sample/Commonvoice(HK)/gt_vocoder/._1.wav
- DictTTS-Supplementary Material/audio_sample/Commonvoice(HK)/gt_vocoder/3.wav
- __MACOSX/DictTTS-Supplementary Material/audio_sample/Commonvoice(HK)/gt_vocoder/._3.wav
- DictTTS-Supplementary Material/audio_sample/Commonvoice(HK)/gt_vocoder/2.wav
- __MACOSX/DictTTS-Supplementary Material/audio_sample/Commonvoice(HK)/gt_vocoder/._2.wav
- DictTTS-Supplementary Material/audio_sample/Commonvoice(HK)/phoneme(pycantonese)/.DS_Store
- __MACOSX/DictTTS-Supplementary Material/audio_sample/Commonvoice(HK)/phoneme(pycantonese)/._.DS_Store
- DictTTS-Supplementary Material/audio_sample/Commonvoice(HK)/phoneme(pycantonese)/5.wav
- __MACOSX/DictTTS-Supplementary Material/audio_sample/Commonvoice(HK)/phoneme(pycantonese)/._5.wav
- DictTTS-Supplementary Material/audio_sample/Commonvoice(HK)/phoneme(pycantonese)/4.wav
- __MACOSX/DictTTS-Supplementary Material/audio_sample/Commonvoice(HK)/phoneme(pycantonese)/._4.wav
- DictTTS-Supplementary Material/audio_sample/Commonvoice(HK)/phoneme(pycantonese)/1.wav
- __MACOSX/DictTTS-Supplementary Material/audio_sample/Commonvoice(HK)/phoneme(pycantonese)/._1.wav
- DictTTS-Supplementary Material/audio_sample/Commonvoice(HK)/phoneme(pycantonese)/3.wav
- __MACOSX/DictTTS-Supplementary Material/audio_sample/Commonvoice(HK)/phoneme(pycantonese)/._3.wav
- DictTTS-Supplementary Material/audio_sample/Commonvoice(HK)/phoneme(pycantonese)/2.wav
- __MACOSX/DictTTS-Supplementary Material/audio_sample/Commonvoice(HK)/phoneme(pycantonese)/._2.wav
- DictTTS-Supplementary Material/audio_sample/jsut/dicttts/.DS_Store
- __MACOSX/DictTTS-Supplementary Material/audio_sample/jsut/dicttts/._.DS_Store
- DictTTS-Supplementary Material/audio_sample/jsut/dicttts/5.wav
- __MACOSX/DictTTS-Supplementary Material/audio_sample/jsut/dicttts/._5.wav
- DictTTS-Supplementary Material/audio_sample/jsut/dicttts/4.wav
- __MACOSX/DictTTS-Supplementary Material/audio_sample/jsut/dicttts/._4.wav
- DictTTS-Supplementary Material/audio_sample/jsut/dicttts/1.wav
- DictTTS-Supplementary Material/audio_sample/jsut/dicttts/3.wav
- DictTTS-Supplementary Material/audio_sample/jsut/dicttts/2.wav
- DictTTS-Supplementary Material/audio_sample/jsut/gt/.DS_Store
- __MACOSX/DictTTS-Supplementary Material/audio_sample/jsut/gt/._.DS_Store
- DictTTS-Supplementary Material/audio_sample/jsut/gt/5.wav
- __MACOSX/DictTTS-Supplementary Material/audio_sample/jsut/gt/._5.wav
- DictTTS-Supplementary Material/audio_sample/jsut/gt/4.wav
- __MACOSX/DictTTS-Supplementary Material/audio_sample/jsut/gt/._4.wav
- DictTTS-Supplementary Material/audio_sample/jsut/gt/1.wav
- __MACOSX/DictTTS-Supplementary Material/audio_sample/jsut/gt/._1.wav
- DictTTS-Supplementary Material/audio_sample/jsut/gt/3.wav
- __MACOSX/DictTTS-Supplementary Material/audio_sample/jsut/gt/._3.wav
- DictTTS-Supplementary Material/audio_sample/jsut/gt/2.wav
- __MACOSX/DictTTS-Supplementary Material/audio_sample/jsut/gt/._2.wav
- DictTTS-Supplementary Material/audio_sample/jsut/character/.DS_Store
- __MACOSX/DictTTS-Supplementary Material/audio_sample/jsut/character/._.DS_Store
- DictTTS-Supplementary Material/audio_sample/jsut/character/5.wav
- __MACOSX/DictTTS-Supplementary Material/audio_sample/jsut/character/._5.wav
- DictTTS-Supplementary Material/audio_sample/jsut/character/4.wav
- __MACOSX/DictTTS-Supplementary Material/audio_sample/jsut/character/._4.wav
- DictTTS-Supplementary Material/audio_sample/jsut/character/1.wav
- __MACOSX/DictTTS-Supplementary Material/audio_sample/jsut/character/._1.wav
- DictTTS-Supplementary Material/audio_sample/jsut/character/3.wav
- __MACOSX/DictTTS-Supplementary Material/audio_sample/jsut/character/._3.wav
- DictTTS-Supplementary Material/audio_sample/jsut/character/2.wav
- __MACOSX/DictTTS-Supplementary Material/audio_sample/jsut/character/._2.wav
- DictTTS-Supplementary Material/audio_sample/jsut/gt_vocoder/.DS_Store
- __MACOSX/DictTTS-Supplementary Material/audio_sample/jsut/gt_vocoder/._.DS_Store
- DictTTS-Supplementary Material/audio_sample/jsut/gt_vocoder/5.wav
- __MACOSX/DictTTS-Supplementary Material/audio_sample/jsut/gt_vocoder/._5.wav
- DictTTS-Supplementary Material/audio_sample/jsut/gt_vocoder/4.wav
- __MACOSX/DictTTS-Supplementary Material/audio_sample/jsut/gt_vocoder/._4.wav
- DictTTS-Supplementary Material/audio_sample/jsut/gt_vocoder/1.wav
- __MACOSX/DictTTS-Supplementary Material/audio_sample/jsut/gt_vocoder/._1.wav
- DictTTS-Supplementary Material/audio_sample/jsut/gt_vocoder/3.wav
- __MACOSX/DictTTS-Supplementary Material/audio_sample/jsut/gt_vocoder/._3.wav
- DictTTS-Supplementary Material/audio_sample/jsut/gt_vocoder/2.wav
- __MACOSX/DictTTS-Supplementary Material/audio_sample/jsut/gt_vocoder/._2.wav
- DictTTS-Supplementary Material/audio_sample/jsut/phoneme(pyopenjtalk)/.DS_Store
- __MACOSX/DictTTS-Supplementary Material/audio_sample/jsut/phoneme(pyopenjtalk)/._.DS_Store
- DictTTS-Supplementary Material/audio_sample/jsut/phoneme(pyopenjtalk)/5.wav
- __MACOSX/DictTTS-Supplementary Material/audio_sample/jsut/phoneme(pyopenjtalk)/._5.wav
- DictTTS-Supplementary Material/audio_sample/jsut/phoneme(pyopenjtalk)/4.wav
- __MACOSX/DictTTS-Supplementary Material/audio_sample/jsut/phoneme(pyopenjtalk)/._4.wav
- DictTTS-Supplementary Material/audio_sample/jsut/phoneme(pyopenjtalk)/1.wav
- __MACOSX/DictTTS-Supplementary Material/audio_sample/jsut/phoneme(pyopenjtalk)/._1.wav
- DictTTS-Supplementary Material/audio_sample/jsut/phoneme(pyopenjtalk)/3.wav
- __MACOSX/DictTTS-Supplementary Material/audio_sample/jsut/phoneme(pyopenjtalk)/._3.wav
- DictTTS-Supplementary Material/audio_sample/jsut/phoneme(pyopenjtalk)/2.wav
- __MACOSX/DictTTS-Supplementary Material/audio_sample/jsut/phoneme(pyopenjtalk)/._2.wav
- DictTTS-Supplementary Material/audio_sample/biaobei/dicttts/.DS_Store
- DictTTS-Supplementary Material/audio_sample/biaobei/dicttts/5.wav
- __MACOSX/DictTTS-Supplementary Material/audio_sample/biaobei/dicttts/._5.wav
- DictTTS-Supplementary Material/audio_sample/biaobei/dicttts/4.wav
- __MACOSX/DictTTS-Supplementary Material/audio_sample/biaobei/dicttts/._4.wav
- DictTTS-Supplementary Material/audio_sample/biaobei/dicttts/1.wav
- __MACOSX/DictTTS-Supplementary Material/audio_sample/biaobei/dicttts/._1.wav
- DictTTS-Supplementary Material/audio_sample/biaobei/dicttts/3.wav
- __MACOSX/DictTTS-Supplementary Material/audio_sample/biaobei/dicttts/._3.wav
- DictTTS-Supplementary Material/audio_sample/biaobei/dicttts/2.wav
- __MACOSX/DictTTS-Supplementary Material/audio_sample/biaobei/dicttts/._2.wav
- DictTTS-Supplementary Material/audio_sample/biaobei/gt/.DS_Store
- DictTTS-Supplementary Material/audio_sample/biaobei/gt/5.wav
- __MACOSX/DictTTS-Supplementary Material/audio_sample/biaobei/gt/._5.wav
- DictTTS-Supplementary Material/audio_sample/biaobei/gt/4.wav
- __MACOSX/DictTTS-Supplementary Material/audio_sample/biaobei/gt/._4.wav
- DictTTS-Supplementary Material/audio_sample/biaobei/gt/1.wav
- __MACOSX/DictTTS-Supplementary Material/audio_sample/biaobei/gt/._1.wav
- DictTTS-Supplementary Material/audio_sample/biaobei/gt/3.wav
- __MACOSX/DictTTS-Supplementary Material/audio_sample/biaobei/gt/._3.wav
- DictTTS-Supplementary Material/audio_sample/biaobei/gt/2.wav
- __MACOSX/DictTTS-Supplementary Material/audio_sample/biaobei/gt/._2.wav
- DictTTS-Supplementary Material/audio_sample/biaobei/nlr/.DS_Store
- DictTTS-Supplementary Material/audio_sample/biaobei/nlr/5.wav
- __MACOSX/DictTTS-Supplementary Material/audio_sample/biaobei/nlr/._5.wav
- DictTTS-Supplementary Material/audio_sample/biaobei/nlr/4.wav
- __MACOSX/DictTTS-Supplementary Material/audio_sample/biaobei/nlr/._4.wav
- DictTTS-Supplementary Material/audio_sample/biaobei/nlr/1.wav
- __MACOSX/DictTTS-Supplementary Material/audio_sample/biaobei/nlr/._1.wav
- DictTTS-Supplementary Material/audio_sample/biaobei/nlr/3.wav
- __MACOSX/DictTTS-Supplementary Material/audio_sample/biaobei/nlr/._3.wav
- DictTTS-Supplementary Material/audio_sample/biaobei/nlr/2.wav
- __MACOSX/DictTTS-Supplementary Material/audio_sample/biaobei/nlr/._2.wav
- DictTTS-Supplementary Material/audio_sample/biaobei/character/.DS_Store
- DictTTS-Supplementary Material/audio_sample/biaobei/character/5.wav
- __MACOSX/DictTTS-Supplementary Material/audio_sample/biaobei/character/._5.wav
- DictTTS-Supplementary Material/audio_sample/biaobei/character/4.wav
- __MACOSX/DictTTS-Supplementary Material/audio_sample/biaobei/character/._4.wav
- DictTTS-Supplementary Material/audio_sample/biaobei/character/1.wav
- __MACOSX/DictTTS-Supplementary Material/audio_sample/biaobei/character/._1.wav
- DictTTS-Supplementary Material/audio_sample/biaobei/character/3.wav
- __MACOSX/DictTTS-Supplementary Material/audio_sample/biaobei/character/._3.wav
- DictTTS-Supplementary Material/audio_sample/biaobei/character/2.wav
- __MACOSX/DictTTS-Supplementary Material/audio_sample/biaobei/character/._2.wav
- DictTTS-Supplementary Material/audio_sample/biaobei/phoneme(pypinyin)/.DS_Store
- DictTTS-Supplementary Material/audio_sample/biaobei/phoneme(pypinyin)/5.wav
- __MACOSX/DictTTS-Supplementary Material/audio_sample/biaobei/phoneme(pypinyin)/._5.wav
- DictTTS-Supplementary Material/audio_sample/biaobei/phoneme(pypinyin)/4.wav
- __MACOSX/DictTTS-Supplementary Material/audio_sample/biaobei/phoneme(pypinyin)/._4.wav
- DictTTS-Supplementary Material/audio_sample/biaobei/phoneme(pypinyin)/1.wav
- DictTTS-Supplementary Material/audio_sample/biaobei/phoneme(pypinyin)/3.wav
- DictTTS-Supplementary Material/audio_sample/biaobei/phoneme(pypinyin)/2.wav
- DictTTS-Supplementary Material/audio_sample/biaobei/gt_vocoder/.DS_Store
- DictTTS-Supplementary Material/audio_sample/biaobei/gt_vocoder/5.wav
- __MACOSX/DictTTS-Supplementary Material/audio_sample/biaobei/gt_vocoder/._5.wav
- DictTTS-Supplementary Material/audio_sample/biaobei/gt_vocoder/4.wav
- __MACOSX/DictTTS-Supplementary Material/audio_sample/biaobei/gt_vocoder/._4.wav
- DictTTS-Supplementary Material/audio_sample/biaobei/gt_vocoder/1.wav
- __MACOSX/DictTTS-Supplementary Material/audio_sample/biaobei/gt_vocoder/._1.wav
- DictTTS-Supplementary Material/audio_sample/biaobei/gt_vocoder/3.wav
- __MACOSX/DictTTS-Supplementary Material/audio_sample/biaobei/gt_vocoder/._3.wav
- DictTTS-Supplementary Material/audio_sample/biaobei/gt_vocoder/2.wav
- __MACOSX/DictTTS-Supplementary Material/audio_sample/biaobei/gt_vocoder/._2.wav
- DictTTS-Supplementary Material/audio_sample/biaobei/phoneme(g2pm)/.DS_Store
- DictTTS-Supplementary Material/audio_sample/biaobei/phoneme(g2pm)/5.wav
- __MACOSX/DictTTS-Supplementary Material/audio_sample/biaobei/phoneme(g2pm)/._5.wav
- DictTTS-Supplementary Material/audio_sample/biaobei/phoneme(g2pm)/4.wav
- __MACOSX/DictTTS-Supplementary Material/audio_sample/biaobei/phoneme(g2pm)/._4.wav
- DictTTS-Supplementary Material/audio_sample/biaobei/phoneme(g2pm)/1.wav
- DictTTS-Supplementary Material/audio_sample/biaobei/phoneme(g2pm)/3.wav
- DictTTS-Supplementary Material/audio_sample/biaobei/phoneme(g2pm)/2.wav
- DictTTS-Supplementary Material/audio_sample/biaobei/BERT_embedding/.DS_Store
- DictTTS-Supplementary Material/audio_sample/biaobei/BERT_embedding/5.wav
- __MACOSX/DictTTS-Supplementary Material/audio_sample/biaobei/BERT_embedding/._5.wav
- DictTTS-Supplementary Material/audio_sample/biaobei/BERT_embedding/4.wav
- __MACOSX/DictTTS-Supplementary Material/audio_sample/biaobei/BERT_embedding/._4.wav
- DictTTS-Supplementary Material/audio_sample/biaobei/BERT_embedding/1.wav
- __MACOSX/DictTTS-Supplementary Material/audio_sample/biaobei/BERT_embedding/._1.wav
- DictTTS-Supplementary Material/audio_sample/biaobei/BERT_embedding/3.wav
- __MACOSX/DictTTS-Supplementary Material/audio_sample/biaobei/BERT_embedding/._3.wav
- DictTTS-Supplementary Material/audio_sample/biaobei/BERT_embedding/2.wav
- __MACOSX/DictTTS-Supplementary Material/audio_sample/biaobei/BERT_embedding/._2.wav
